# Supplementary material
Source: PubMed Central journal article supplement (PMC3792081)
Supplement: NIHMS3461-supplement-Table.pdf [file NIHMS3461-supplement-Table.pdf]

**Table DS1** Zero-order correlations between all variables included in analyses

|                         | 1      | 2     | 3      | 4      | 5      | 6      | 8     | 9     | 10    | 11    | 12    | 13    | 14    | 15    | 16     | 17    |
|-------------------------|--------|-------|--------|--------|--------|--------|-------|-------|-------|-------|-------|-------|-------|-------|--------|-------|
| 1. Intervention         | 1.00   |       |        |        |        |        |       |       |       |       |       |       |       |       |        |       |
| 2. Impulsivity          | -0.16* | 1.00  |        |        |        |        |       |       |       |       |       |       |       |       |        |       |
| 3. Antisocial behavior  | -0.16* | 0.10  | 1.00   |        |        |        |       |       |       |       |       |       |       |       |        |       |
| 4. School engagement    | 0.24*  | -0.04 | -0.26* | 1.00   |        |        |       |       |       |       |       |       |       |       |        |       |
| 5. Deviant friends      | -0.20* | -0.06 | 0.62*  | -0.33* | 1.00   |        |       |       |       |       |       |       |       |       |        |       |
| 6. Parental supervision | 0.16*  | -0.09 | -0.48* | 0.49*  | -0.37* | 1.00   |       |       |       |       |       |       |       |       |        |       |
| 8. Alcohol 14           | -0.14* | 0.01  | 0.49*  | -0.15* | 0.42*  | -0.18* | 1.00  |       |       |       |       |       |       |       |        |       |
| 9. Alcohol 15           | -0.13* | 0.08  | 0.36*  | -0.07  | 0.37*  | -0.23* | 0.65* | 1.00  |       |       |       |       |       |       |        |       |
| 10. Alcohol 16          | -0.10  | 0.14* | 0.25*  | -0.08* | 0.28*  | -0.18* | 0.59* | 0.68* | 1.00  |       |       |       |       |       |        |       |
| 11. Alcohol 17          | -0.06  | 0.03  | 0.27*  | -0.02  | 0.23*  | -0.05  | 0.46* | 0.65* | 0.69* | 1.00  |       |       |       |       |        |       |
| 12. Drugs 14            | 0.02   | -0.05 | 0.26*  | -0.13  | 0.39*  | -0.22* | 0.49* | 0.36* | 0.30* | 0.35* | 1.00  |       |       |       |        |       |
| 13. Drugs 15            | -0.12  | 0.05  | 0.29*  | -0.09  | 0.39*  | -0.23* | 0.55* | 0.64* | 0.53* | 0.61* | 0.55* | 1.00  |       |       |        |       |
| 14. Drugs 16            | -0.18* | 0.24* | 0.27*  | -0.09  | 0.38*  | -0.21* | 0.48* | 0.61* | 0.59* | 0.62* | 0.46* | 0.67* | 1.00  |       |        |       |
| 15. Drugs 17            | -0.13  | 0.25* | 0.19*  | -0.11  | 0.34*  | -0.12  | 0.40* | 0.52* | 0.49* | 0.69* | 0.46* | 0.61* | 0.67* | 1.00  |        |       |
| 16. Verbal IQ           | 0.11   | 0.03  | 0.12   | 0.09   | -0.01  | 0.04   | 0.14* | 0.05  | 0.15* | 0.11  | -0.07 | 0.00  | 0.02  | -0.13 | 1.00   |       |
| 17. Family adversity    | 0.04   | 0.13  | 0.00   | -0.12  | 0.14*  | -0.05  | 0.08  | 0.06  | 0.11  | 0.08  | 0.16* | 0.06  | 0.08  | 0.18* | -0.26* | 1.00  |
| 18. Disruptiveness at 6 | 0.10   | 0.33* | 0.03   | -0.10  | 0.14*  | 0.12   | 0.06  | 0.05  | 0.02  | 0.05  | 0.14* | 0.02  | 0.11  | 0.11  | -0.15* | 0.18* |

\* $P < 0.05$ .
